# Supplementary material for: In situ Gelling Hydroxypropyl Cellulose Formulation Comprising Cannabidiol-Loaded Block Copolymer Micelles for Sustained Drug Delivery
Source: MDPI journal article supplement (doi:10.3390/ijms242216534), 2023-11-20
Supplement: s1 [file s1]

## Electronic Supplementary Information

### In situ Gelling Hydroxypropyl Cellulose Formulation Comprising Cannabidiol-Loaded Block Copolymer Micelles for Sustained Drug Delivery

Katya Kamenova<sup>1</sup>, Denitsa Momekova<sup>2</sup>, Georgy Grancharov<sup>1</sup>, Anna Prancheva<sup>1</sup>, Natalia Toncheva-Moncheva<sup>1</sup>, Ervin Ivanov<sup>2,3</sup>, Spiro Konstantinov<sup>2</sup>, and Petar D. Petrov<sup>1,\*</sup>

<sup>1</sup> Institute of Polymers, Bulgarian Academy of Sciences, 1113 Sofia, Bulgaria; k kamenova@polymer.bas.bg (K.K.); granchar@polymer.bas.bg (G.G.); a\_prancheva@polymer.bas.bg (A.P.); ntoncheva@polymer.bas.bg (N.T.)

<sup>2</sup> Faculty of Pharmacy, Medical University of Sofia, 1000 Sofia, Bulgaria; dmomekova@pharmfac.mu-sofia.bg (D.M.); ervin.ivanov@gmail.com (E.I.); skonstantinov@pharmfac.mu-sofia.bg (S.K.)

<sup>3</sup> Pobelch Gle Ltd., Byalo Pole St. 3, 1618 Sofia, Bulgaria

\* Correspondence: ppetrov@polymer.bas.bg; Tel.: +359-2-9796335

## EXPERIMENTAL

### Synthesis of diblock copolymers

Poly(ethylene oxide)-*block*-poly( $\alpha$ -cinnamyl- $\epsilon$ -caprolactone-*co*- $\epsilon$ -caprolactone) diblock copolymers was synthesized via two-step procedure involving ring-opening polymerization of  $\epsilon$ -CL and  $\alpha$ -propargyl- $\epsilon$ -caprolactone from methoxy poly(ethylene oxide) macroinitiator and subsequent grafting of cinnamyl groups via “click” reaction [1].

*Synthesis of poly(ethylene oxide)-block-poly( $\alpha$ -propargyl- $\epsilon$ -caprolactone-*co*- $\epsilon$ -caprolactone)*

Polymerization was carried out in an oven dried 50 ml two-neck round bottom flask under an inert atmosphere. In a typical run, methoxy PEO<sub>113</sub>-OH (1.5 g, 0.3 mmol, 1 eq.) dried by azeotropic distillation from anhydrous toluene,  $\epsilon$ -CL (1.08 g, 9.45 mmol, 90 eq.),  $\alpha$ -propargyl- $\epsilon$ -caprolactone (0.16 g, 1.05 mmol, 10 eq.), and toluene (15 mL) were placed in the flask. The solution was degassed by argon flow for 20 min and the catalyst Sn(Oct)<sub>2</sub> (21.5 mg, 0.053 mmol, 0.5 mol % of both monomers) was added, followed by further degassing for 20 min. The reaction mixture was stirred at 115 °C for 24 hours and poured into cold isopropanol. The precipitated copolymer was collected by filtration and dried thoroughly in vacuum. Yield 2.5 g. <sup>1</sup>H NMR(600 MHz, CDCl<sub>3</sub>)  $\delta$  (ppm)= 4.21 (t, 2H, -CH<sub>2</sub>O-), 4.05 (t, 54H, -CH<sub>2</sub>O-), 3.50-3.82 (m, 450H, -CH<sub>2</sub>O-), 3.37 (s, 3H, CH<sub>3</sub>-O-), 2.53-2.58 (m, 1H, COCHCH<sub>2</sub>), 2.43-2.49 (m, 1H, COCHCH<sub>2</sub>), 2.35-2.42 (m, 1H, COCHCH<sub>2</sub>), 2.30 (t, 54H, -COCH<sub>2</sub>O-), 2.00 (2, 1H, -C $\equiv$ CH-), 1.50-1.79 (m, 108H, CH<sub>2</sub>-CH<sub>2</sub>-CH<sub>2</sub>-CH<sub>2</sub>-O-), 1.30-1.48 (m, 54H, COCH<sub>2</sub>CH<sub>2</sub>).

***Synthesis of poly(ethylene oxide)-block-poly( $\alpha$ -cinnamyl- $\epsilon$ -caprolactone-co- $\epsilon$ -caprolactone)***

In an oven dried 50 ml two-neck round bottom flask the copolymer (4.3 % propargyl units; 1g, 0.124 mmol, 1 eq.), CuI (109.7 mg, 0.576 mmol, 4 eq.), and cinnamyl azide (45.8 mg, 0.288 mmol, 2 eq.) were added under an inert atmosphere, and degassed 3 times. After that, 5 ml of THF was added and the system was purged for approximately 20 min with inert gas, parallel to a vial of N,N-diisopropylethylamine. Finally, degassed DIPEA (74.4 mg, 0.576 mmol, 4 eq.) was added, the whole system was purged additionally with an inert gas for 20 min and the mixture was stirred at temperature 40°C for 24 h. Then, 50 ml of THF was added and the reaction mixture was passed through a neutral aluminium oxide (Al<sub>2</sub>O<sub>3</sub>) plug to remove the copper salts. The mixture was then dissolved in a minimal amount of THF and precipitated into cold isopropanol. Yield 0.98 g. <sup>1</sup>H NMR(600MHz, CD<sub>2</sub>Cl<sub>2</sub>)  $\delta$  (ppm)= 7.18-7.60 (m, 6H, ArH), 4.21 (t, 2H, -CH<sub>2</sub>O-), 4.05 (t, 54H, -CH<sub>2</sub>O-), 3.45-3.95

(m, 450H, -CH<sub>2</sub>O-), 3.40 (s, 3H, CH<sub>3</sub>-O-), 2.26-2.38 (m, 54H, -COCH<sub>2</sub>O-), 1.55-1.80 (m, 108H, CH<sub>2</sub>-CH<sub>2</sub>-CH<sub>2</sub>-CH<sub>2</sub>-O-), 1.33-1.46 (m, 54H, COCH<sub>2</sub>CH<sub>2</sub>).

### ***Synthesis of poly(ethylene oxide)-block-poly( $\epsilon$ -caprolactone)***

Polymerization was carried out in an oven dried 50 ml two-neck round bottom flask under an inert atmosphere. In a typical run, PEG<sub>113</sub>-OH (1.5 g, 0.3 mmol, 1 eq.) dried by azeotropic distillation from anhydrous toluene,  $\epsilon$ -CL (1.2 g, 10.5 mmol, 35 eq.) and toluene (15 mL) were placed in the flask. The solution was degassed by argon flow for 20 min and catalyst Sn(Oct)<sub>2</sub> (21.5 mg, 0.053 mmol, 0.5 mol % of the monomer) was added, followed by further degassing for 20 min. The reaction mixture was stirred at 115 °C for 24 hours and poured into cold isopropanol. The precipitated copolymer was collected by filtration and dried thoroughly in vacuum. Yield 2.6 g. <sup>1</sup>H NMR(600 MHz, CDCl<sub>3</sub>)  $\delta$  (ppm)= 4.22 (t, 2H, -CH<sub>2</sub>O-), 4.05 (t, 57H, -CH<sub>2</sub>O-), 3.50-3.85 (m, 450H, -CH<sub>2</sub>O-), 3.37 (s, 3H, CH<sub>3</sub>-O-), 2.31 (t, 57H, -COCH<sub>2</sub>O-), 1.55-1.80 (m, 114H, CH<sub>2</sub>-CH<sub>2</sub>-CH<sub>2</sub>-CH<sub>2</sub>-O-), 1.33-1.43 (m, 57H, COCH<sub>2</sub>CH<sub>2</sub>).

**Table S1.** Composition and molecular characteristics of diblock copolymers.

| Copolymer                                                                      | M <sub>n</sub> <sup>(NMR)</sup><br>(g/mol) | M <sub>n</sub> <sup>(SEC)</sup><br>(g/mol) | DI <sup>(SEC)</sup> |
|--------------------------------------------------------------------------------|--------------------------------------------|--------------------------------------------|---------------------|
| PEO <sub>113</sub> -b-P(CyCL <sub>1</sub> -co-CL <sub>27</sub> ) <sub>28</sub> | 8400                                       | 6200                                       | 1.04                |
| PEO <sub>113</sub> -b-P(CyCL <sub>1</sub> -co-CL <sub>12</sub> ) <sub>13</sub> | 6680                                       | 5100                                       | 1.07                |
| PEO <sub>113</sub> -b-PCL <sub>29</sub>                                        | 8310                                       | 7950                                       | 1.12                |

[1] Atanasova, M-D, Grancharov, G, Petrov, PD. Poly(ethylene oxide)-block-poly( $\alpha$ -cinnamyl- $\epsilon$ -caprolactone-co- $\epsilon$ -caprolactone) diblock copolymer nanocarriers for enhanced solubilization of caffeic acid phenethyl ester. *J Polym Sci.* 2021; 59: 251–260.

## FIGURES

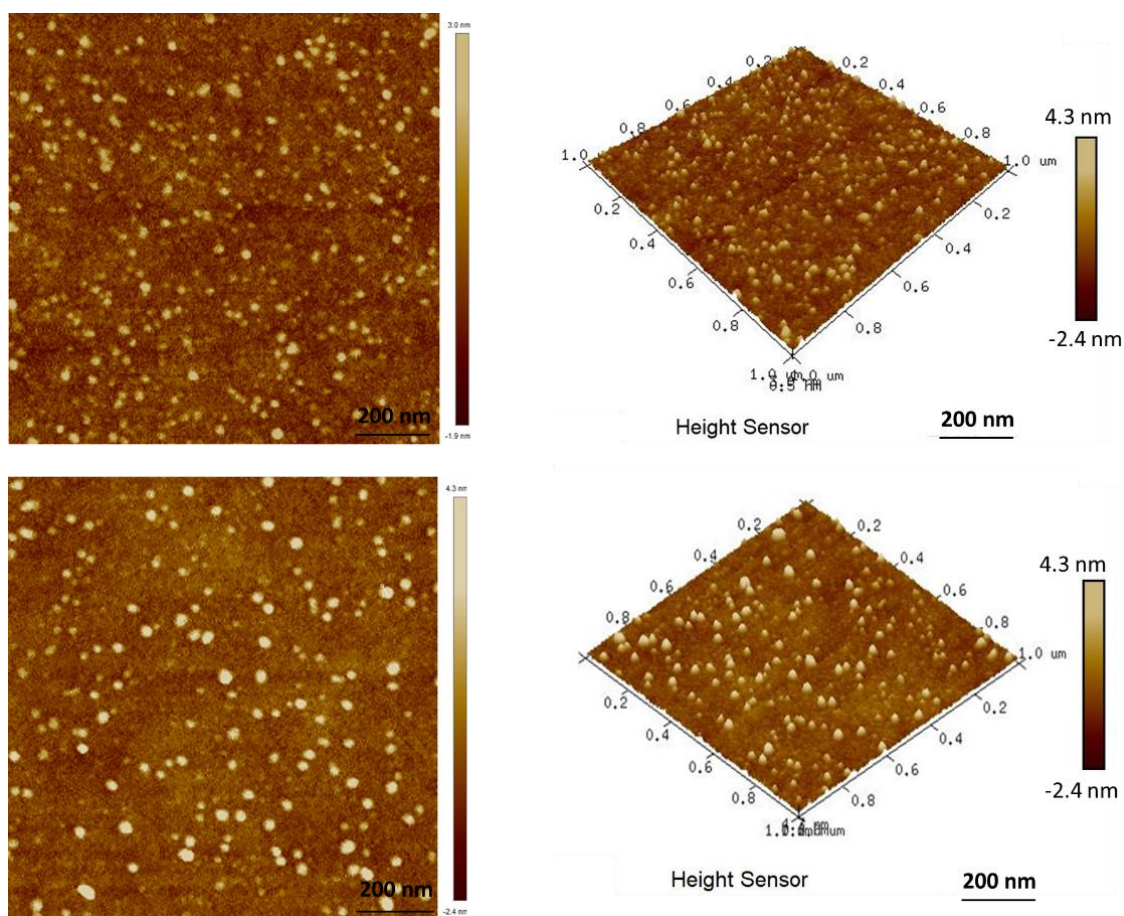

**Figure S1.** Representative 2D and 3D AFM images of blank (top) and CBD-loaded PEO<sub>113</sub>-*b*-P(CyCL<sub>1</sub>-*co*-CL<sub>27</sub>)<sub>28</sub> micelles (bottom).

## Pure HPC

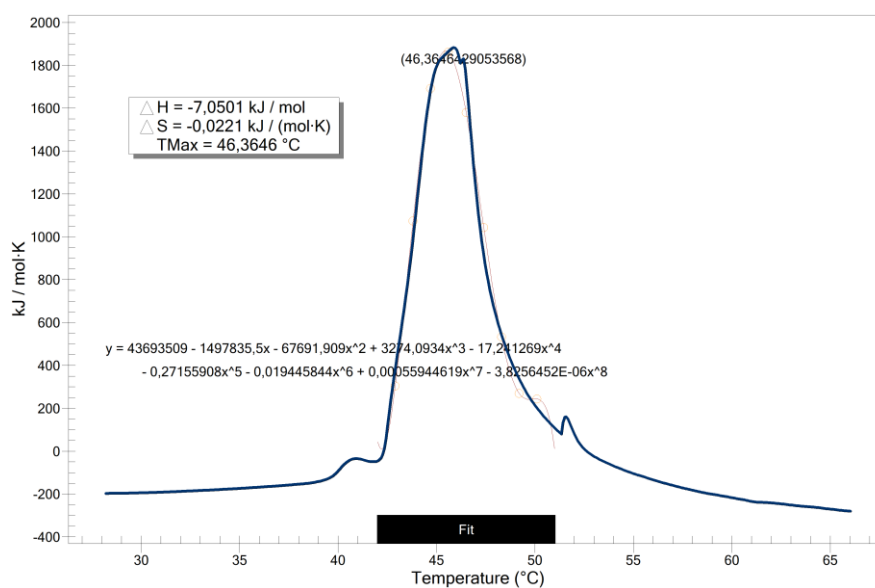

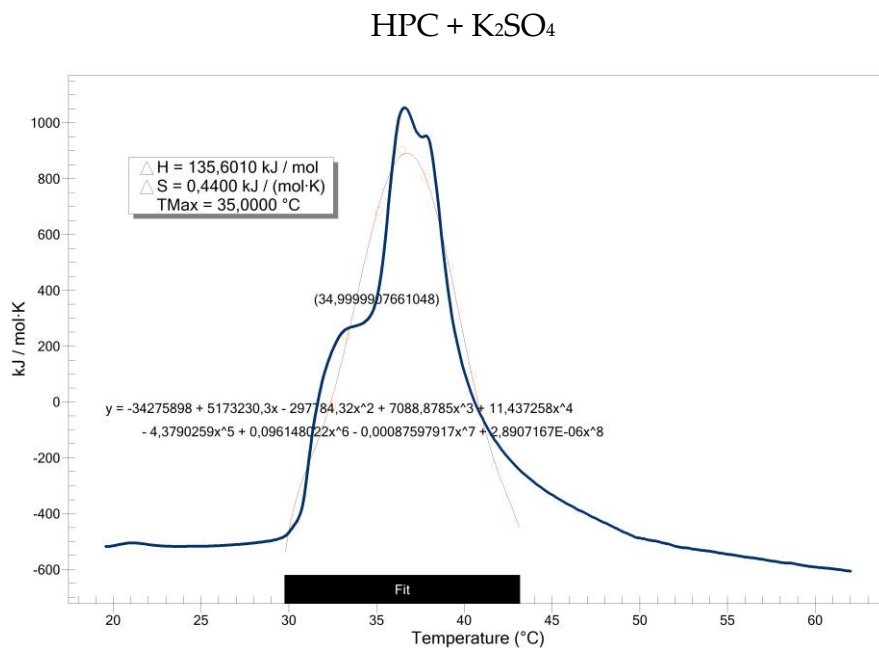

**Figure S2.** NanoDSC plots of aqueous HPC solutions (5 mass %), without (top) and with 0.15 mol L<sup>-1</sup> K<sub>2</sub>SO<sub>4</sub> (bottom).

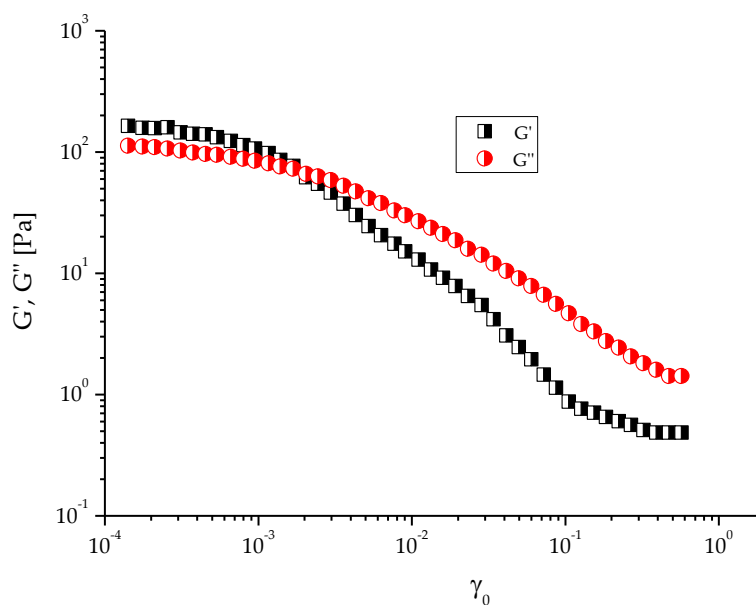

**Figure S3.** Variation in storage ( $G'$ ) and loss ( $G''$ ) moduli as a function of the strain amplitude for HPC (10 mass %) hydrogel containing K<sub>2</sub>SO<sub>4</sub> (0.15 mol L<sup>-1</sup>). The oscillation amplitude sweep tests were carried out at 37 °C at a frequency of 1 Hz in the  $\gamma_0$  range from 0.0001 to 1.

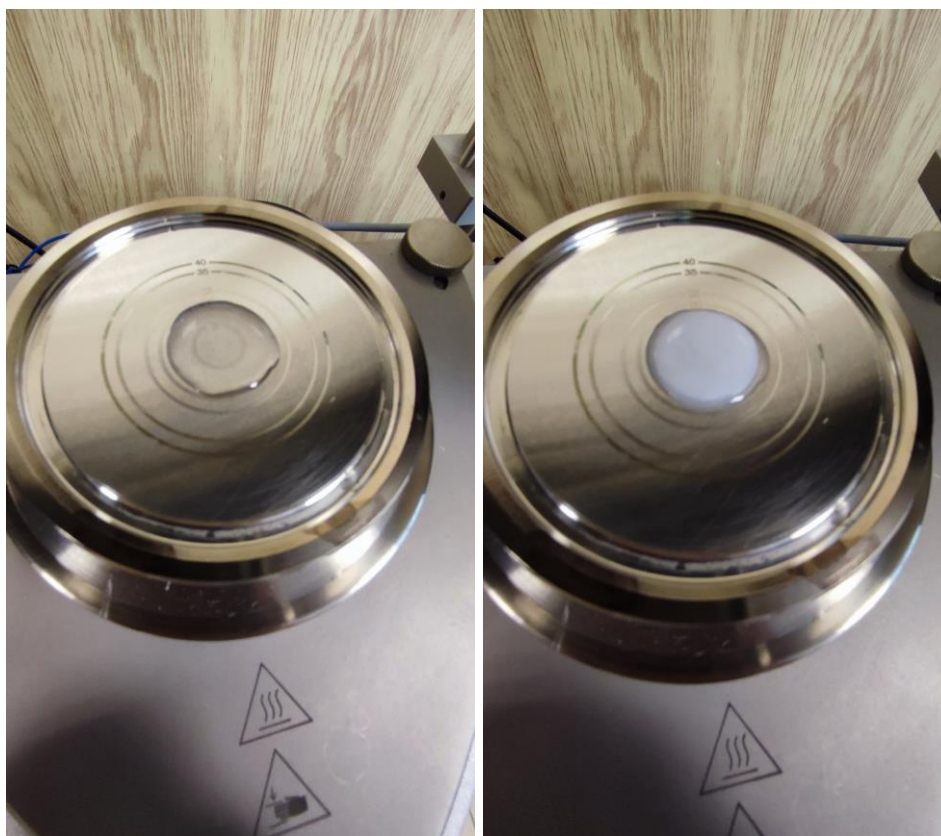

**Figure S4.** Digital images of an aqueous HPC (10 mass %) solution, containing  $\text{K}_2\text{SO}_4$  ( $0.15 \text{ molL}^{-1}$ ) and CBD-loaded micelles ( $1 \text{ gL}^{-1}$ ) at  $25^\circ\text{C}$  (left), and the corresponding hydrogel formed at  $37^\circ\text{C}$  (right).

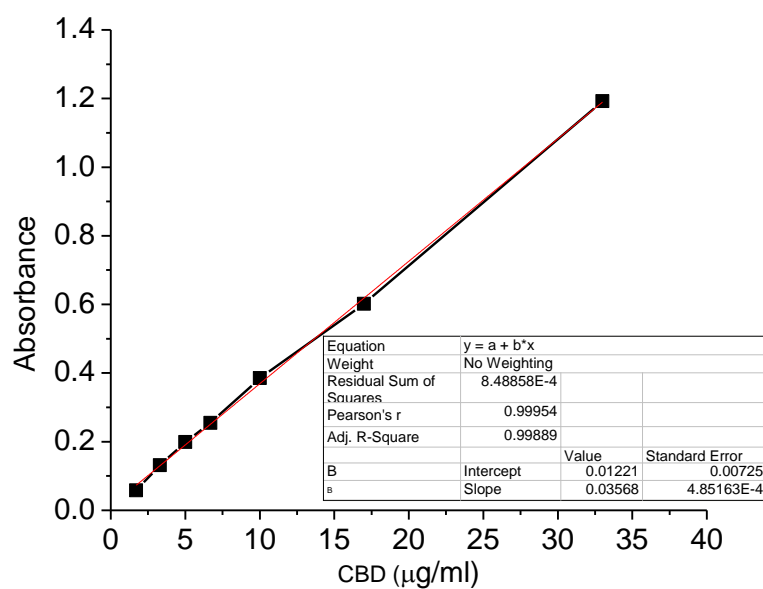

**Figure S5.** Standard curve of CBD in methanol at  $\lambda = 274$  ( $R^2 = 0.99954$ ).

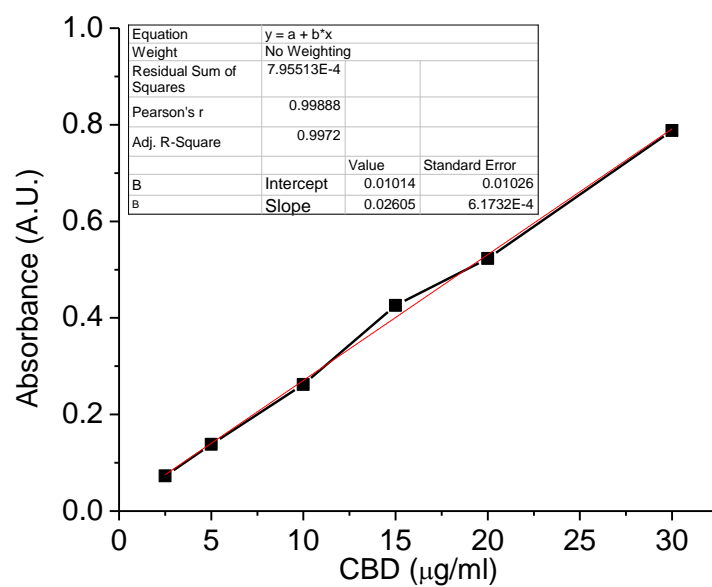

**Figure S6.** Standard curve of CBD in PBS + 5% ethanol at  $\lambda = 274$  ( $R^2 = 0.9988$ ).
